# Supplementary material for: Microbiome-Metabolome Analysis Insight into the Effects of the Extract of Phyllanthus emblica L. on High-Fat Diet-Induced Hyperlipidemia
Source: MDPI journal article supplement (doi:10.3390/metabo14050257), 2024-04-29
Supplement: s1 [file s1]

## *Supplementary data*

**Table S1.** The composition of mouse feed

| <b>D12450B</b> (10% calories from fat) |            |              | <b>D12451</b> (45% calories from fat) |              |
|----------------------------------------|------------|--------------|---------------------------------------|--------------|
| <b>Energy supply ratio</b>             | <b>gm%</b> | <b>Kcal%</b> | <b>gm%</b>                            | <b>Kcal%</b> |
| Protein                                | 19.2       | 20           | 24                                    | 20           |
| Carbohydrate                           | 67.3       | 70           | 41                                    | 35           |
| Fat                                    | 4.3        | 10           | 24                                    | 45           |
| Kcal/gm                                | 3.85       | 100          | 4.73                                  | 100          |
| <b>Ingredient</b>                      | <b>gm</b>  | <b>Kcal</b>  | <b>gm</b>                             | <b>Kcal</b>  |
| Casein, 80 Mesh                        | 200        | 800          | 200                                   | 800          |
| L-Cystine                              | 3          | 12           | 3                                     | 12           |
| Corn Starch                            | 315        | 1260         | 72.8                                  | 291          |
| Maltodextrin 10                        | 35         | 140          | 100                                   | 400          |
| Sucrose                                | 350        | 1400         | 172.8                                 | 691          |
| Cellulose, BW200                       | 50         | 0            | 50                                    | 0            |
| Soybean Oil                            | 25         | 225          | 25                                    | 225          |
| Lard*                                  | 20         | 180          | 177.5                                 | 1598         |
| Mineral Mix S10026                     | 10         | 0            | 10                                    | 0            |
| DiCalcium Phosphate                    | 13         | 0            | 13                                    | 0            |
| Calcium Carbonate                      | 5.5        | 0            | 5.5                                   | 0            |
| Potassium Citrate, 1                   | 16.5       | 0            | 16.5                                  | 0            |
| H2O                                    | 10         | 40           | 10                                    | 40           |

**Table S2.** The method validation of developed HPLC-UV method

| Compounds       | Precisions(n=6) | Stability(24h,n=6) | Repeatability(n=6) | Recovery(n=3)       |      |
|-----------------|-----------------|--------------------|--------------------|---------------------|------|
|                 | RSD%            | RSD%               | RSD%               | Average Recovery(%) | RSD% |
| Gallic acid     | 0.5%            | 0.9%               | 2.0%               | 100.0%              | 2.2% |
| Corilagin       | 0.3%            | 0.8%               | 1.6%               | 99.9%               | 2.5% |
| Chebulagic acid | 0.7%            | 0.8%               | 1.9%               | 101.1%              | 2.2% |
| Ellagic acid    | 0.4%            | 1.0%               | 1.7%               | 100.4%              | 3.4% |

(The HPLC-UV method was validated in terms of precision, stability, repeatability and accuracy. The precision was assessed based on six replicate measurements of the same sample solution in one day. To evaluate stability, the same sample solution was stored at 4°C and analyzed after 0, 2, 4, 8, 12 and 24 h, respectively. Repeatability was evaluated by independent analysis of six different sample solutions prepared from the same sample. Recovery tests were carried out to investigate the accuracy of the HPLC-UV method using the standard addition method. These parameters showed that this HPLC-UV method was effective to quantify the bioactive compounds in used FEPE medicinal materials.)

**Table S3** Regression equation, correlation coefficient, linear range, LOD and LOQ of 4 reference substances

| Compounds       | Calibration curve | Correlation coefficient | Linear range /mg·L <sup>-1</sup> | LOD/ mg·L <sup>-1</sup> | LOQ/ mg·L <sup>-1</sup> |
|-----------------|-------------------|-------------------------|----------------------------------|-------------------------|-------------------------|
| Gallic acid     | Y=14 463X-70 447  | 0.999 6                 | 92.24~1 477.00                   | 50.32                   | 167.73                  |
| Corilagin       | Y=13 158X-35 837  | 1.000 0                 | 8.50~543.75                      | 2.92                    | 9.75                    |
| Chebularic acid | Y=5 626.5X-88 455 | 0.999 8                 | 18.91~605.00                     | 13.51                   | 45.02                   |
| Ellagic acid    | Y=19 574X-3 859.2 | 0.999 9                 | 30.96~663.60                     | 10.09                   | 33.62                   |

(According to literature survey, four bioactive compounds were determined to characterize the quality of the fruit extract of *Phyllanthus emblica* L. (FEPE) medicinal materials used in our study. For each reference standard, calibration curve was developed by plotting its peak area against the standard concentration. As seen in this table, the correlation coefficients are all higher than 0.999, and all the determination of bioactive compounds are within the linear range. These parameter showed that this HPLC-UV method was effective to quantity the bioactive compounds in used FEPE medicinal materials.)

**Table S4** Regression equation, correlation coefficient, linear range of 6 reference substances

| Compounds       | Calibration curve       | Correlation coefficient | Linear range / $\mu\text{g}\cdot\text{L}^{-1}$ |
|-----------------|-------------------------|-------------------------|------------------------------------------------|
| Acetic acid     | $Y=68878x-1\text{E}+06$ | 0.9995                  | 30~240                                         |
| Propionic acid  | $Y=50017x-49315$        | 0.9993                  | 12~120                                         |
| Isobutyric acid | $Y=108395x+20306$       | 0.9994                  | 1.2~12                                         |
| Butyric acid    | $Y=102911-357391$       | 0.9998                  | 20~160                                         |
| Isovaleric acid | $Y=105325x+92973$       | 0.9999                  | 3.2~32                                         |
| Valeric acid    | $Y=101145x+176800$      | 1                       | 2~20                                           |

The content of six short-chain fatty acids in faeces was determined according to a literature survey. For each reference standard, calibration curve was developed by plotting its peak area against the standard concentration. As seen in this table, the correlation coefficients are all higher than 0.999, and all the determination of bioactive compounds are within the linear range. The results showed that the GC-MS method was effective in determining the content of short-chain fatty acids in faeces.

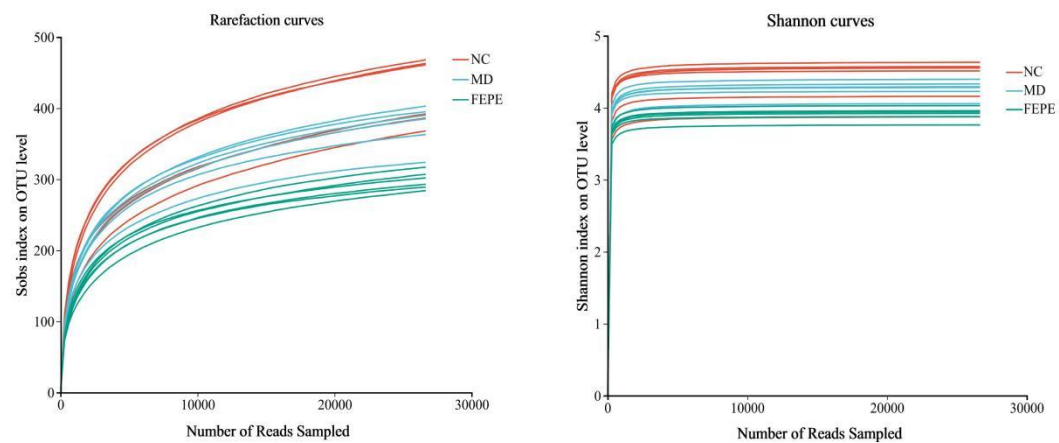

Figure S1 Sobs and Shannon curves at the OTU level

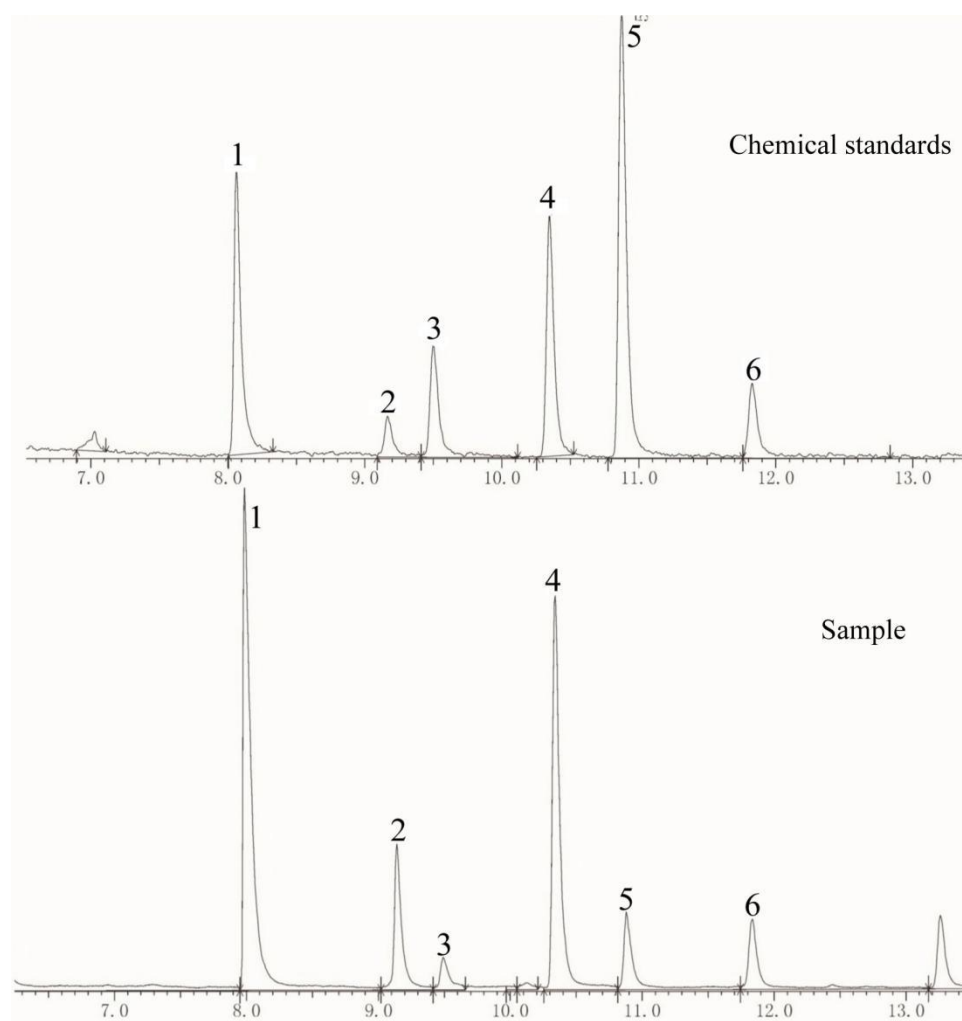

Figure S2 Short-chain fatty acid content in feces. (1) Acetic acid, (2) Propionic acid, (3) Isobutyric acid, (4) Butyric acid, (5) Isovaleric acid, (6) Valeric acid





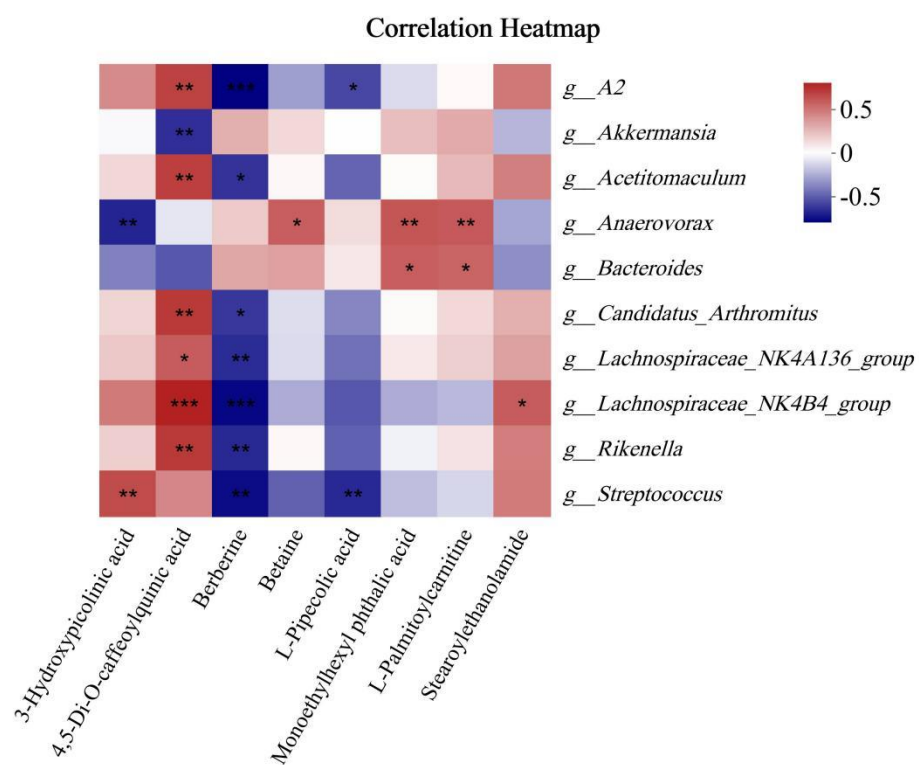

Figure S4 Correlation analysis between gut microbes and liver metabolites.
